# Supplementary material
Source: HighWire-hosted journal article supplement (https://ijgc.bmj.com/highwire/filestream/19136/field_highwire_adjunct_files/0/ijgc-2020-002315supp001_data_supplement.pdf)
Supplement: ijgc-2020-002315supp001_data_supplement.pdf [file ijgc-2020-002315supp001_data_supplement.pdf]

**Supplementary Table 1: Results of Delphi Round Two (Questionnaire 1)**  
**Level of consensus on steps (mandatory optional, prohibited) to complete a SLND.**

| Domain                          | Meaning                                                                    | Level of Consensus/Response                          |
|---------------------------------|----------------------------------------------------------------------------|------------------------------------------------------|
| <b>Choice of Tracing Agent</b>  | ICG should be used as the tracer                                           | Mandatory 87.9%<br>Optional 12.1%<br>Prohibited 0%   |
|                                 | Blue dye (Iso-sulfan, methylene, patent blue) should be used as the tracer | Mandatory 0%<br>Optional 75.8%<br>Prohibited 24.2%   |
|                                 | Radio-technetium should be used as the tracer                              | Mandatory 0%<br>Optional 63.6%<br>Prohibited 36.4%   |
| <b>Site of Tracer Injection</b> | Inject dye into the ectocervix in four positions                           | Mandatory 9.1%<br>Optional 69.7%<br>Prohibited 21.2% |
|                                 | Inject dye into the ectocervix in two positions                            | Mandatory 69.7%<br>Optional 21.2%<br>Prohibited 9.1% |
|                                 | Inject dye into the uterus (abdomino-pelvic approach)                      | Mandatory 0%<br>Optional 21.2%<br>Prohibited 78.8%   |
|                                 | Inject dye into the uterus                                                 | Mandatory 0%                                         |

|                              |                                                              |                                                       |
|------------------------------|--------------------------------------------------------------|-------------------------------------------------------|
|                              | – fundal (hysteroscopic approach)                            | Optional 27.3%<br>Prohibited 72.7%                    |
| <b>Tracer Concentration</b>  | ICG – 1.25mg/ml (dilute 25mg of ICG with 20ml sterile water) | Mandatory 59.4%<br>Optional 37.5%<br>Prohibited 3.1%  |
|                              | ICG – 0.5mg/ml                                               | Mandatory 6.3%<br>Optional 40.6%<br>Prohibited 53.1%  |
|                              | Blue dye - neat                                              | Mandatory 6.3%<br>Optional 56.3%<br>Prohibited 37.5%  |
| <b>Total Volume Injected</b> | 4ml                                                          | Mandatory 50.0%<br>Optional 40.6%<br>Prohibited 9.4%  |
|                              | 2ml                                                          | Mandatory 28.1%<br>Optional 46.9%<br>Prohibited 25.0% |
|                              | 1ml                                                          | Mandatory 3.1%<br>Optional 25.0%<br>Prohibited 71.9%  |
| <b>Injection Depth</b>       | Deep Only                                                    | Mandatory 6.3%<br>Optional 21.9%<br>Prohibited 71.9%  |

|                           |                                                |                                                       |
|---------------------------|------------------------------------------------|-------------------------------------------------------|
|                           | Superficial (submucosal)<br>Only               | Mandatory 18.8%<br>Optional 40.6%<br>Prohibited 40.6% |
|                           | Deep AND Superficial                           | Mandatory 56.3%<br>Optional 37.5%<br>Prohibited 6.3%  |
| <b>Syringe Size</b>       | 1ml                                            | Mandatory 28.1%<br>Optional 40.6%<br>Prohibited 31.3% |
|                           | 2ml                                            | Mandatory 12.5%<br>Optional 56.3%<br>Prohibited 31.3% |
|                           | 5ml                                            | Mandatory 21.9%<br>Optional 40.6%<br>Prohibited 37.5% |
|                           | 10ml                                           | Mandatory 3.1%<br>Optional 28.1%<br>Prohibited 68.8%  |
| <b>Needle and syringe</b> | Change needle and syringe after each injection | Mandatory 12.5%<br>Optional 50.0%<br>Prohibited 37.5% |
| <b>Injection Pace</b>     | Inject slowly                                  | Mandatory 65.6%<br>Optional 21.9%                     |

|                                                      |                                   |                                                                                                                                              |
|------------------------------------------------------|-----------------------------------|----------------------------------------------------------------------------------------------------------------------------------------------|
|                                                      |                                   | Prohibited 12.5%                                                                                                                             |
|                                                      | Pace of injection does not matter | Mandatory 18.8%<br>Optional 21.9%<br>Prohibited 59.4%                                                                                        |
|                                                      | Aim for feeling of 'resistance'   | Mandatory 62.5%<br>Optional 28.1%<br>Prohibited 9.4%                                                                                         |
|                                                      | Aim to achieve submucosal 'bleb'  | Mandatory 40.6%<br>Optional 50.0%<br>Prohibited 9.4%                                                                                         |
| <b>What is Your Preferred Needle Diameter/Gauge?</b> | Free text                         | 5G 3.1% (1)<br>18G 6.2% (2)<br>20G 12.5% (4)<br>21G 9.4% (3)<br>22G 18.8% (6)<br>23G 6.2% (2)<br>24G 9.4% (3)<br>25G 25% (8)<br>27G 9.4% (3) |
| <b>What is Your Preferred Needle Length?</b>         |                                   | As long as possible 50.0%<br>As short as possible 12.5%<br>It does not matter 37.5%                                                          |
| <b>Uterine Manipulation</b>                          | Use a uterine manipulator         | Mandatory 15.6%                                                                                                                              |

|                                                          |                                                                |                                                       |
|----------------------------------------------------------|----------------------------------------------------------------|-------------------------------------------------------|
|                                                          |                                                                | Optional 71.9%<br>Prohibited 12.5%                    |
|                                                          | DO NOT use a uterine manipulator                               | Mandatory 15.6%<br>Optional 59.4%<br>Prohibited 25.0% |
|                                                          | Insert uterine manipulator BEFORE tracer injection             | Mandatory 0%<br>Optional 9.4%<br>Prohibited 90.6%     |
|                                                          | Insert uterine manipulator AFTER tracer injection              | Mandatory 65.6%<br>Optional 21.9%<br>Prohibited 12.5% |
| <b>Timing of Laparoscopic/Robotic Entry</b>              | Inject tracer BEFORE abdominal entry/pneumoperitoneum obtained | Mandatory 37.5%<br>Optional 50.0%<br>Prohibited 12.5% |
|                                                          | Inject tracer AFTER abdominal entry/pneumoperitoneum obtained  | Mandatory 13.3%<br>Optional 60.0%<br>Prohibited 26.7% |
| <b>Ensure Access to Pelvic Side Walls/Nodal Stations</b> | Mobilise adhesions BEFORE tracer injection                     | Mandatory 21.9%<br>Optional 46.9%<br>Prohibited 31.3% |
|                                                          | Mobilise adhesions AFTER                                       | Mandatory 37.5%                                       |

|                                                                                                 |                                                                                                  |                                                       |
|-------------------------------------------------------------------------------------------------|--------------------------------------------------------------------------------------------------|-------------------------------------------------------|
|                                                                                                 | tracer injection                                                                                 | Optional 34.4%<br>Prohibited 28.1%                    |
| <b>Confirm No Macroscopic Disease Outside Uterus</b>                                            | Undertake abdomino-pelvic inspection with white light BEFORE tracer injection                    | Mandatory 46.9%<br>Optional 43.8%<br>Prohibited 9.4%  |
|                                                                                                 | Undertake abdomino-pelvic inspection with white light AFTER tracer injection                     | Mandatory 46.9%<br>Optional 43.8%<br>Prohibited 9.4%  |
|                                                                                                 | Undertake abdomino-pelvic inspection with white light IRRESPECTIVE of timing of tracer injection | Mandatory 59.4%<br>Optional 28.1%<br>Prohibited 12.5% |
| <b>Transperitoneal Inspection Using Your Preferred Technique to Identify Lymphatic Channels</b> | Pelvic side walls                                                                                | Mandatory 93.8%<br>Optional 3.1%<br>Prohibited 3.1%   |
|                                                                                                 | Common iliac/pre-sacral areas                                                                    | Mandatory 68.8%<br>Optional 25.0%<br>Prohibited 6.3%  |
|                                                                                                 | Para-aortic area                                                                                 | Mandatory 53.1%<br>Optional 40.6%                     |

|                                                                                                                                         |                                                     |                                                       |
|-----------------------------------------------------------------------------------------------------------------------------------------|-----------------------------------------------------|-------------------------------------------------------|
|                                                                                                                                         |                                                     | Prohibited 6.3%                                       |
| <b>Commence Dissection by<br/>Opening Pelvic Side Walls</b>                                                                             | Divide round ligament                               | Mandatory 28.1%<br>Optional 56.3%<br>Prohibited 15.6% |
|                                                                                                                                         | Preserve round ligament                             | Mandatory 15.6%<br>Optional 75.0%<br>Prohibited 9.4%  |
|                                                                                                                                         | Secure and divide<br>infundibulo-pelvic<br>ligament | Mandatory 6.3%<br>Optional 65.6%<br>Prohibited 28.1%  |
|                                                                                                                                         | Preserve infundibulo-<br>pelvic ligament            | Mandatory 34.4%<br>Optional 59.4%<br>Prohibited 6.3%  |
|                                                                                                                                         | Open para-vesical space                             | Mandatory 71.9%<br>Optional 25.0%<br>Prohibited 3.1%  |
|                                                                                                                                         | Open para-rectal space                              | Mandatory 68.8%<br>Optional 28.1%<br>Prohibited 3.1%  |
| <b>Identifying Anatomy, Lymphatic<br/>Channels and Sentinel Nodes:<br/>These structures should be<br/>mandatory/optional identified</b> | Ureter                                              | Mandatory 93.8%<br>Optional 12.5%<br>Prohibited 0%    |
|                                                                                                                                         | Obliterated umbilical                               | Mandatory 87.5%                                       |

|                                                                                                               |                                                                |                                                      |
|---------------------------------------------------------------------------------------------------------------|----------------------------------------------------------------|------------------------------------------------------|
| <b>or should not be identified<br/>(prohibited/unwarranted)<br/>during sentinel lymph node<br/>dissection</b> | artery/ligament                                                | Optional 12.5%<br>Prohibited 0%                      |
|                                                                                                               | Superior vesical artery                                        | Mandatory 28.1%<br>Optional 62.5%<br>Prohibited 9.4% |
|                                                                                                               | Uterine artery (medial aspect)                                 | Mandatory 34.4%<br>Optional 65.6%<br>Prohibited 0%   |
|                                                                                                               | Uterine artery (lateral aspect)                                | Mandatory 37.5%<br>Optional 56.3%<br>Prohibited 6.3% |
|                                                                                                               | External iliac artery and vein                                 | Mandatory 100%<br>Optional 0%<br>Prohibited 0%       |
|                                                                                                               | Internal iliac artery and vein                                 | Mandatory 75.0%<br>Optional 21.9%<br>Prohibited 3.1% |
|                                                                                                               | Obturator nerve                                                | Mandatory 65.6%<br>Optional 31.3%<br>Prohibited 3.1% |
| <b>Identifying Anatomy, Lymphatic Channels and Sentinel Nodes:<br/>The sentinel node is mapped...</b>         | Start at the level of the uterine artery and continue medially | Mandatory 9.4%<br>Optional 62.5%<br>Prohibited 28.1% |



|  |                                                                                               |                                                       |
|--|-----------------------------------------------------------------------------------------------|-------------------------------------------------------|
|  | TOWARDS the uterus                                                                            |                                                       |
|  | Start at the level of the uterine artery and continue laterally/distally AWAY from the uterus | Mandatory 65.6%<br>Optional 21.9%<br>Prohibited 12.5% |
|  | Start at the level of the uterine artery and continue towards the presacral areas             | Mandatory 21.9%<br>Optional 56.3%<br>Prohibited 21.9% |
|  | Start at the most highlighted node and dissect proximally (TOWARDS cervix)                    | Mandatory 15.6%<br>Optional 59.4%<br>Prohibited 25.0% |
|  | Start at the most highlighted node and dissect proximally (AWAY from the cervix)              | Mandatory 28.1%<br>Optional 40.6%<br>Prohibited 31.3% |
|  | It is important to avoid disruption of lymphatic channels during dissection                   | Mandatory 81.3%<br>Optional 15.6%<br>Prohibited 3.1%  |
|  | Retroperitoneal dissection should be blunt only                                               | Mandatory 9.4%<br>Optional 59.4%<br>Prohibited 31.3%  |

|                                                                                                                                 |                                                                                  |                                                       |
|---------------------------------------------------------------------------------------------------------------------------------|----------------------------------------------------------------------------------|-------------------------------------------------------|
|                                                                                                                                 | Retroperitoneal dissection can compromise blunt and electro-surgical techniques  | Mandatory 50.0%<br>Optional 37.5%<br>Prohibited 12.5% |
| <b>Identifying Anatomy, Lymphatic Channels and Sentinel Nodes: In each hemi-pelvis, the sentinel node that you remove is...</b> | A single mapped node                                                             | Mandatory 43.8%<br>Optional 40.6%<br>Prohibited 15.6% |
|                                                                                                                                 | The first (most proximal to the uterus) node identifiable in the channel pathway | Mandatory 81.3%<br>Optional 9.4%<br>Prohibited 9.4%   |
|                                                                                                                                 | Any node that demonstrates uptake (i.e. 'maps') with tracing agent               | Mandatory 9.4%<br>Optional 40.6%<br>Prohibited 50.0%  |
|                                                                                                                                 | All mapped nodes in the pelvis should be excised                                 | Mandatory 15.6%<br>Optional 25.0%<br>Prohibited 59.4% |
|                                                                                                                                 | The importance of mapping presacral nodes(s) is                                  | Mandatory 28.1%<br>Optional 56.3%<br>Prohibited 15.6% |
|                                                                                                                                 | The importance of mapping nodes(s) on the lateral pelvic wall is                 | Mandatory 53.1%<br>Optional 37.5%<br>Prohibited 9.4%  |

|                                                                                                                   |                                                                                                    |                                                       |
|-------------------------------------------------------------------------------------------------------------------|----------------------------------------------------------------------------------------------------|-------------------------------------------------------|
|                                                                                                                   | The importance of mapping node(s) in the aortic/caval areas is                                     | Mandatory 21.9%<br>Optional 65.6%<br>Prohibited 12.5% |
| <b>Excision and Confirmation of Mapped Nodes:</b><br><b>Mapped nodes should be excised using these techniques</b> | Isolation from local anatomy                                                                       | Mandatory 87.5%<br>Optional 9.4%<br>Prohibited 3.1%   |
|                                                                                                                   | Firm but gentle traction                                                                           | Mandatory 62.5%<br>Optional 28.1%<br>Prohibited 9.4%  |
|                                                                                                                   | Blunt dissection                                                                                   | Mandatory 34.4%<br>Optional 62.5%<br>Prohibited 0%    |
|                                                                                                                   | Electrosurgery                                                                                     | Mandatory 31.3%<br>Optional 68.8%<br>Prohibited 0%    |
|                                                                                                                   | Application of haemostatic clips                                                                   | Mandatory 0%<br>Optional 84.4%<br>Prohibited 15.6%    |
|                                                                                                                   | Dissection/excision should be completed in one hemi-pelvis before proceeding to contralateral side | Mandatory 53.1%<br>Optional 37.5%<br>Prohibited 9.4%  |

|                                                                                                                                      |                                               |                                                      |
|--------------------------------------------------------------------------------------------------------------------------------------|-----------------------------------------------|------------------------------------------------------|
| <b>Excision and Confirmation of Mapped Nodes: During surgery, excised tissue should be confirmed as nodal using these techniques</b> | Ex-vivo green fluorescence (if using ICG)     | Mandatory 77.4%<br>Optional 22.6%<br>Prohibited 0%   |
|                                                                                                                                      | Macroscopic inspection, palpation or incision | Mandatory 56.3%<br>Optional 37.5%<br>Prohibited 6.3% |
|                                                                                                                                      | Fresh frozen section                          | Mandatory 6.3%<br>Optional 46.9%<br>Prohibited 46.9% |
| <b>Specimen Retrieval: Contained removal of sentinel nodal tissue can be undertaken using these methods</b>                          | Endocatch bag via port                        | Mandatory 37.5%<br>Optional 59.4%<br>Prohibited 3.1% |
|                                                                                                                                      | Finger of sterile glove via port              | Mandatory 6.3%<br>Optional 78.1%<br>Prohibited 15.6% |
|                                                                                                                                      | Laparoscopic 'cup forceps'                    | Mandatory 6.3%<br>Optional 43.8%<br>Prohibited 50.0% |
|                                                                                                                                      | Endocatch bag via colpotomy                   | Mandatory 3.1%<br>Optional 68.8%<br>Prohibited 28.1% |
|                                                                                                                                      | Removal of nodes                              | Mandatory 0%                                         |

|                                                                            |                                                       |                                                       |
|----------------------------------------------------------------------------|-------------------------------------------------------|-------------------------------------------------------|
|                                                                            | through port without protection                       | Optional 21.9%<br>Prohibited 78.1%                    |
| <b>Sentinel Node Specimens:<br/>Labelling of specimen(s)</b>               | Obturator, external iliac, common iliac, aortic/caval | Mandatory 75.0%<br>Optional 21.9%<br>Prohibited 3.1%  |
|                                                                            | Lateral pelvis, presacral                             | Mandatory 50.0%<br>Optional 28.1%<br>Prohibited 21.9% |
|                                                                            | Pelvic, aortic                                        | Mandatory 50.0%<br>Optional 18.8%<br>Prohibited 31.2% |
|                                                                            | Right, left                                           | Mandatory 68.8%<br>Optional 6.3%<br>Prohibited 0%     |
| <b>Sentinel Node Specimens:<br/>Pathology processing of sentinel nodes</b> | Pathological ultrastaging using immunohistochemistry  | Mandatory 93.8%<br>Optional 6.3%<br>Prohibited 0%     |
|                                                                            | Standard H.E. staining                                | Mandatory 53.1%<br>Optional 21.9%<br>Prohibited 25.0% |
| <b>Troubleshooting Action Plan for 'no nodes mapped'</b>                   | Reinject tracing agent                                | Mandatory 18.8%<br>Optional 62.5%<br>Prohibited 18.8% |

|  |                                                                                            |                                                      |
|--|--------------------------------------------------------------------------------------------|------------------------------------------------------|
|  | Wait – undertake dissection on contralateral hemi-pelvis before returning to original side | Mandatory 31.3%<br>Optional 65.6%<br>Prohibited 3.1% |
|  | Extend retro-peritoneal dissection to encompass common/presacral and para-aortic areas     | Mandatory 34.4%<br>Optional 59.4%<br>Prohibited 6.3% |
|  | Undertake a side-specific lymphadenectomy                                                  | Mandatory 62.5%<br>Optional 37.5%<br>Prohibited 0%   |
